# Supplementary material for: Formulation of Stable and Homogeneous Cell-Penetrating Peptide NF55 Nanoparticles for Efficient Gene Delivery In Vivo
Source: PubMed Central journal article supplement (PMC5723355; doi:10.1016/j.omtn.2017.10.011), 2017-10-20
Supplement: mmc1.pdf [file mmc1.pdf]

OMTN, Volume 10

## Supplemental Information

### Formulation of Stable and Homogeneous Cell-Penetrating Peptide NF55 Nanoparticles for Efficient Gene Delivery *In Vivo*

Krista Freimann, Piret Arukuusk, Kaido Kurrikoff, Ly Pärnaste, Raivo Raid, Andres Piirsoo, Margus Pooga, and Ülo Langel

## Supplementary information

**Table S1. The mean hydrodynamic diameter of the differently formulated nanoparticles**

| Formulation of nanoparticles      | Time, min | Hydrodynamic diameter, nm (Intensity) | pDI           | Size distribution by volume (%) |
|-----------------------------------|-----------|---------------------------------------|---------------|---------------------------------|
| Formulation 1                     | 1-60      | 124.8 ± 1.6                           | 0.142 ± 0.01  | 98.6                            |
| Formulation 2                     | 1         | 112.4 ± 6.55                          | 0.608 ± 0.024 | 35                              |
|                                   |           | 423 ± 59.57                           |               | 40.3                            |
|                                   |           | 4295 ± 36.23                          |               | 24.6                            |
| Formulation 2<br>Filtrated 200 nm | 1         | 108.4 ± 5.39                          | 0.122 ± 0.014 | 100                             |
| Formulation 2<br>Filtrated 200 nm | 60        | 115 ± 4.285                           | 0.120 ± 0.017 | 100                             |
| CCC                               | 1         | 85.11 ± 14.02                         | 0.211 ± 0.009 | 97.3                            |
|                                   |           | 2082 ± 991.6                          |               | 2.7                             |
| CCC                               | 60        | 77.8 ± 0.41                           | 0.184 ± 0.023 | 87.5                            |
|                                   |           | 2055 ± 818.2                          |               | 12.5                            |

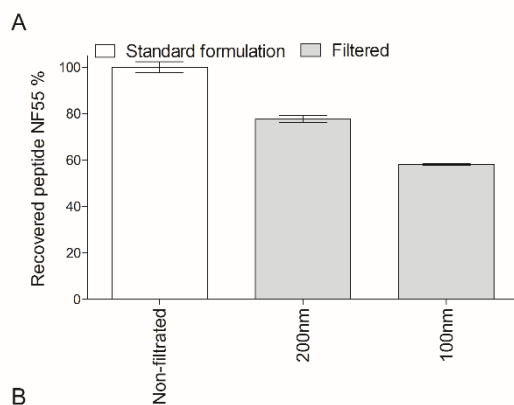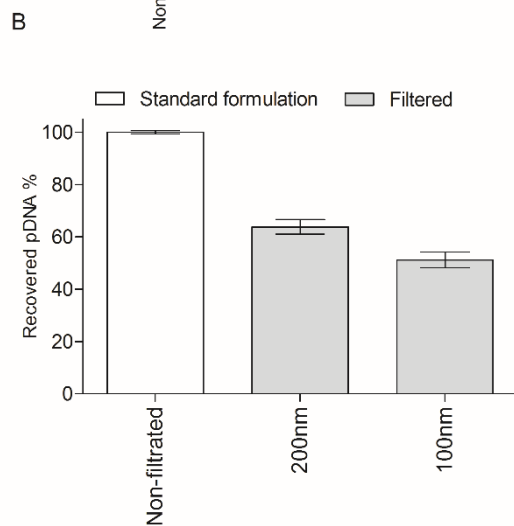

**Figure S1.** Recovery of peptide (A) and pDNA (B) after filtration of the formulated nanoparticles. PicoGreen (for pDNA) and the DC protein determination kit were used respectively to quantify the components of nanoparticles. The data are presented as the mean  $\pm$  SEM ( $n = 3$ )

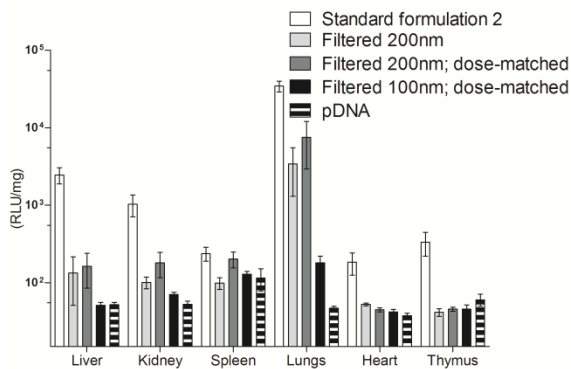

**Figure S2.** Expression of marker gene in Balb/c mice transfected by NF55/pDNA nanoparticles after filtration at CR4. The data are from at least five representative experiments, presented as the mean  $\pm$  SEM

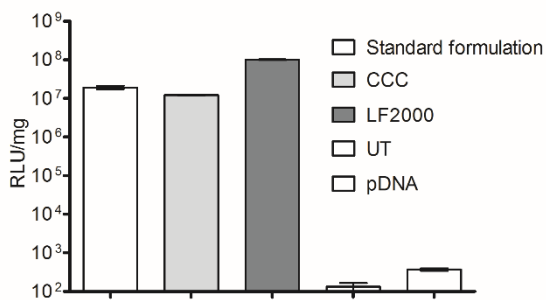

**Figure S3.** Expression of marker gene in CHO cells transfected by NF55/pDNA CCC nanoparticles at CR4. Untreated cells (UT) were used as a negative control and Lipofectamine™ 2000 (LF2000) was used as a positive control. The data are presented as the mean  $\pm$  SEM ( $n = 3$ )

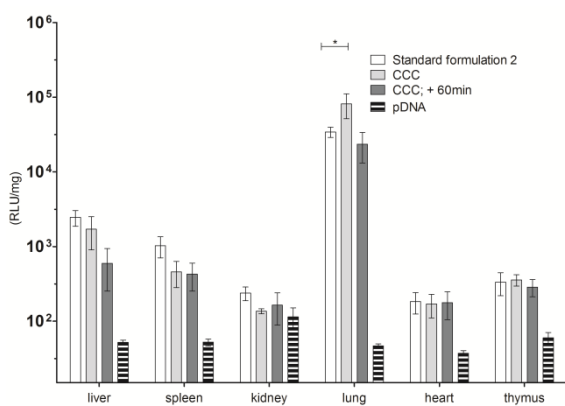

**Figure S4.** Expression of marker gene in Balb/c mice transfected by NF55/pDNA nanoparticles produced by CCC and standard formulation 2 at CR4. The data from at least five representative experiments are presented as the mean  $\pm$  SEM, \* $P < 0.05$  (Student's  $t$ -test, two-tailed distribution, two-sample unequal variance).

A

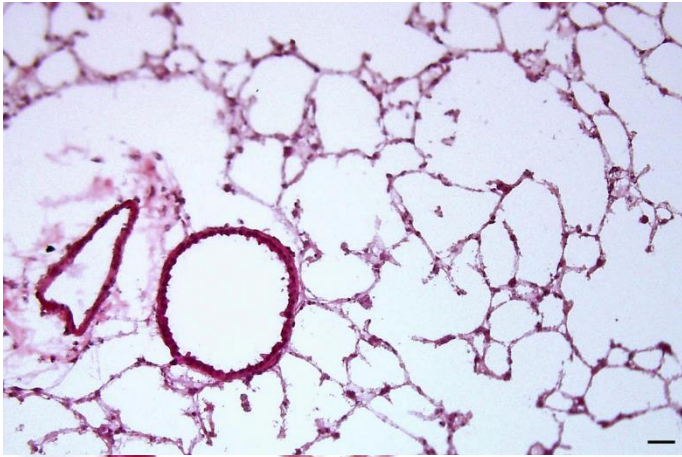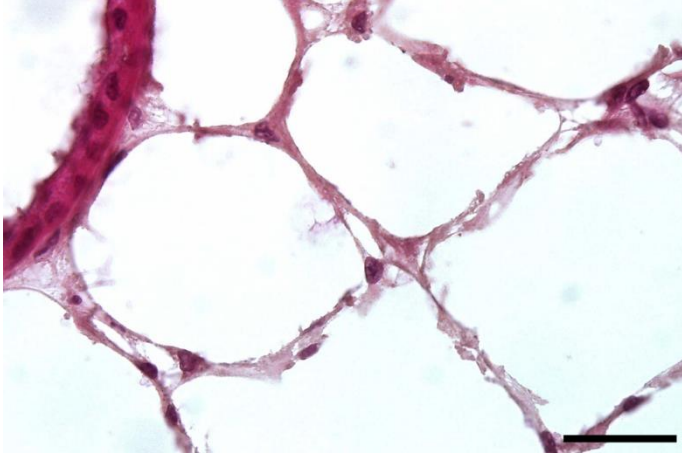

B

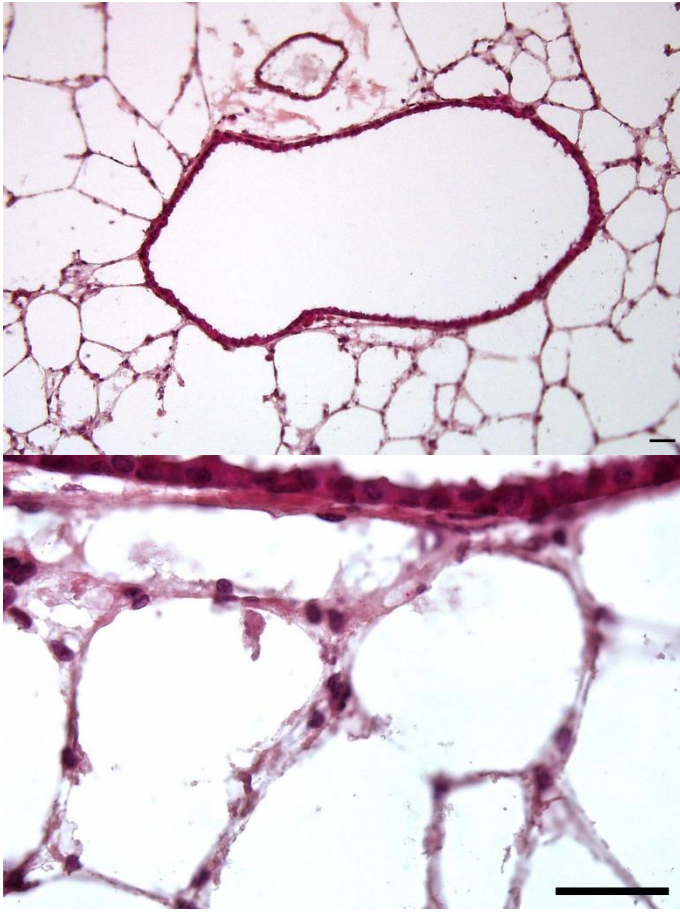

**Figure S5.** H&E stained tissue from representative lung areas of the animals that have received NF55/pDNA CCC (1 mg/kg pDNA dose) (A) or NF55/pDNA CCC with additional 60 min complex incubation (B). The size bar represents 30  $\mu$ m.
